# Supplementary material
Source: publisher figshare collection journal article supplement (https://sage.figshare.com/ndownloader/files/12394733)
Supplement: Supplementary file 1 [file 12394733]

# Online Appendix

## Stopgappers? : The Occupational Trajectories of Men in Female-Dominated Occupations

Margarita Torre

**Table A1.** Odds Ratio Coefficients of Exit From a Female-Dominated Occupation (Time Dummies; Only Men).

|                                                        | Exit                |                         |                        |
|--------------------------------------------------------|---------------------|-------------------------|------------------------|
|                                                        | All workers         | High-status occupations | Low-status occupations |
| High-status occupations (r.c.: low-status occupations) | 0.708***<br>(0.082) |                         |                        |
| Top manager (r.c.: professionals)                      |                     | 0.877<br>(0.316)        |                        |
| Managers (r.c.: professionals)                         |                     | 1.402<br>(0.431)        |                        |
| Blue-collar (r.c.: service, sales, clerical workers)   |                     |                         | 1.352†<br>(0.247)      |
| Last occupation (r.c.: female)                         |                     |                         |                        |
| Male                                                   | 2.031***<br>(0.197) | 2.014***<br>(0.517)     | 2.025***<br>(0.205)    |
| Neutral                                                | 1.740***<br>(0.179) | 1.724†<br>(0.483)       | 1.709***<br>(0.183)    |
| Unemployed                                             | 1.596**             | 1.495                   | 1.549**                |

(continued)

**Table A1.** (continued)

|                                         | Exit                |                         |                        |
|-----------------------------------------|---------------------|-------------------------|------------------------|
|                                         | All workers         | High-status occupations | Low-status occupations |
|                                         | (0.306)             | (0.890)                 | (0.315)                |
| Work experience                         |                     |                         |                        |
| Tenure (years)                          | 0.321***<br>(0.014) | 0.403***<br>(0.044)     | 0.297***<br>(0.016)    |
| Tenure <sup>2</sup> (years)             | 1.051***<br>(0.003) | 1.031***<br>(0.007)     | 1.058***<br>(0.005)    |
| Tenure of the occupation                | 0.984<br>(0.029)    | 1.010<br>(0.049)        | 0.969<br>(0.034)       |
| Full-time worker                        | 1.115<br>(0.110)    | 1.089<br>(0.345)        | 1.100<br>(0.119)       |
| Number of prior jobs                    | 0.900***<br>(0.017) | 0.895**<br>(0.042)      | 0.892***<br>(0.018)    |
| Unemployment episodes                   | 0.928**<br>(0.035)  | 0.949<br>(0.080)        | 0.924**<br>(0.034)     |
| Total years of work experience          | 0.950***<br>(0.017) | 1.031<br>(0.047)        | 0.933***<br>(0.017)    |
| Sociodemographic controls               |                     |                         |                        |
| College                                 | 1.865***<br>(0.382) | 2.184**<br>(0.758)      | 1.280<br>(0.414)       |
| Field of study: female-dominated        | 0.891<br>(0.074)    | 0.759<br>(0.154)        | 0.916<br>(0.085)       |
| Married (r.c.: single)                  | 1.341***<br>(0.109) | 1.112<br>(0.231)        | 1.403***<br>(0.121)    |
| Separated or divorced<br>(r.c.: single) | 1.461***<br>(0.169) | 1.406<br>(0.542)        | 1.481***<br>(0.179)    |
| N                                       | 5,252               | 1,009                   | 4,243                  |
| Clusters                                | 1,293               | 199                     | 1,218                  |
| $\chi^2$                                | 1.181.122           | 226.652                 | 1.039.589              |

Note. Time dummies not shown. Exponentiated coefficients; numbers in parentheses are robust standard errors. Individuals are clustered. r.c. = reference category.

\*\*\* $p < .01$ . \*\* $p < .05$ . † $p < .01$ .

**Table A2.** Probability of Change in Occupations. Odds Ratio Coefficients for Men and Women.

|                                                         | High-status<br>occupations | Low-status<br>occupations |
|---------------------------------------------------------|----------------------------|---------------------------|
| Top manager<br>(r.c.: professionals)                    | 0.882**<br>(0.044)         |                           |
| Managers (r.c.: professionals)                          | 1.060<br>(0.043)           |                           |
| Blue-collar (r.c.: service,<br>sales, clerical workers) |                            | 1.112***<br>(0.043)       |
| Sex composition of the occupation (r.c.: male)          |                            |                           |
| Neutral                                                 | 1.065<br>(0.072)           | 0.918<br>(0.061)          |
| Female                                                  | 0.519***<br>(0.033)        | 0.760***<br>(0.046)       |
| Male                                                    | 0.809***<br>(0.038)        | 0.679***<br>(0.035)       |
| Sex composition of the occupation × Male                |                            |                           |
| Neutral × Male                                          | 0.970<br>(0.081)           | 1.278***<br>(0.101)       |
| Female × Male                                           | 1.896***<br>(0.221)        | 1.987***<br>(0.138)       |
| Work experience                                         |                            |                           |
| Full-time worker                                        | 0.860***<br>(0.040)        | 0.750***<br>(0.021)       |
| Number of prior jobs                                    | 1.061***<br>(0.007)        | 1.083***<br>(0.005)       |
| Unemployment episodes                                   | 1.051***<br>(0.011)        | 1.037***<br>(0.007)       |
| Total years of work experience                          | 0.994<br>(0.008)           | 1.033***<br>(0.006)       |
| Sociodemographic controls                               | 0.786**                    | 1.327**                   |
| College                                                 | (0.086)<br>1.051           | (0.178)<br>1.124***       |
| Field of study: female-dominated                        | (0.048)<br>0.967           | (0.051)<br>0.941**        |
| Getting married                                         | (0.041)<br>1.011           | (0.026)<br>1.042          |
| Getting separated or divorced                           | (0.062)                    | (0.038)                   |

(continued)

**Table A2.** (continued)

|                           | High-status<br>occupations | Low-status<br>occupations |
|---------------------------|----------------------------|---------------------------|
| Change in parental status | 1.101**<br>(0.042)         | 1.108***<br>(0.028)       |
| Time                      | 0.897***<br>(0.013)        | 0.923***<br>(0.007)       |
| Time <sup>2</sup>         | 0.998***<br>(0.000)        | 0.997***<br>(0.000)       |
| N                         | 26,855                     | 62,671                    |
| $\chi^2$                  | 3.231.911                  | 7.722.902                 |

Note. Exponentiated coefficients; numbers in parentheses are robust standard errors. Individuals are clustered. r.c. = reference category.

\*\*\* $p < .01$ . \*\* $p < .05$ .

**Table A3.** Odds Ratio Coefficients of Exit From a Female-Dominated Occupation (Only Women).

|                                                         | Exit                |                            |                           |
|---------------------------------------------------------|---------------------|----------------------------|---------------------------|
|                                                         | All workers         | High-status<br>occupations | Low-status<br>occupations |
| Top manager (r.c.: professionals)                       |                     | 1.166<br>(0.458)           |                           |
| Managers (r.c.: professionals)                          |                     | 1.465**<br>(0.263)         |                           |
| Blue-collar (r.c.: service,<br>sales, clerical workers) |                     |                            | 2.112***<br>(0.218)       |
| Last occupation (r.c.: female)                          |                     |                            |                           |
| Male                                                    | 1.046<br>(0.058)    | 1.023<br>(0.149)           | 1.041<br>(0.062)          |
| Neutral                                                 | 0.498***<br>(0.025) | 0.336***<br>(0.043)        | 0.549***<br>(0.029)       |
| Unemployed                                              | 0.654***<br>(0.054) | 0.569**<br>(0.127)         | 0.678***<br>(0.060)       |
| Work experience                                         |                     |                            |                           |
| Tenure (years)                                          | 0.520***<br>(0.010) | 0.551***<br>(0.027)        | 0.509***<br>(0.011)       |

(continued)

**Table A3.** (continued)

|                                     | Exit                |                         |                        |
|-------------------------------------|---------------------|-------------------------|------------------------|
|                                     | All workers         | High-status occupations | Low-status occupations |
| Tenure <sup>2</sup> (years)         | 1.020***<br>(0.001) | 1.016***<br>(0.003)     | 1.022***<br>(0.001)    |
| Tenure of the occupation            | 0.978**<br>(0.011)  | 1.030<br>(0.023)        | 0.995<br>(0.015)       |
| Full-time worker                    | 1.156***<br>(0.053) | 1.018<br>(0.136)        | 1.176***<br>(0.058)    |
| Number of prior jobs                | 0.958***<br>(0.009) | 1.011<br>(0.022)        | 0.945***<br>(0.010)    |
| Unemployment episodes               | 0.949***<br>(0.012) | 0.963<br>(0.037)        | 0.946***<br>(0.014)    |
| Total years of work experience      | 0.979**<br>(0.010)  | 1.004<br>(0.022)        | 0.995<br>(0.011)       |
| Sociodemographic controls           |                     |                         |                        |
| College                             | 1.438**<br>(0.246)  | 1.630†<br>(0.446)       | 1.414†<br>(0.279)      |
| Field of study:<br>female-dominated | 0.634***<br>(0.064) | 0.468***<br>(0.108)     | 0.689***<br>(0.076)    |
| Getting married                     | 1.002<br>(0.051)    | 1.141<br>(0.154)        | 0.975<br>(0.053)       |
| Getting separated or divorced       | 1.124†<br>(0.079)   | 0.832<br>(0.167)        | 1.143†<br>(0.084)      |
| Change in parental status           | 1.004<br>(0.047)    | 1.076<br>(0.126)        | 0.982<br>(0.049)       |
| Time                                | 1.209***<br>(0.017) | 1.183***<br>(0.051)     | 1.217***<br>(0.018)    |
| Time <sup>2</sup>                   | 0.994***<br>(0.000) | 0.993***<br>(0.001)     | 0.994***<br>(0.000)    |
| N                                   | 25,144              | 5,905                   | 19,239                 |
| $\chi^2$                            | 2,242.783           | 418.760                 | 1,826.061              |
| Clusters                            | 2,140               | 770                     | 2,013                  |

Note. Exponentiated coefficients; numbers in parentheses are robust standard errors. Individuals are clustered. r.c. = reference category.

\*\*\* $p < .01$ . \*\* $p < .05$ . † $p < .01$ .

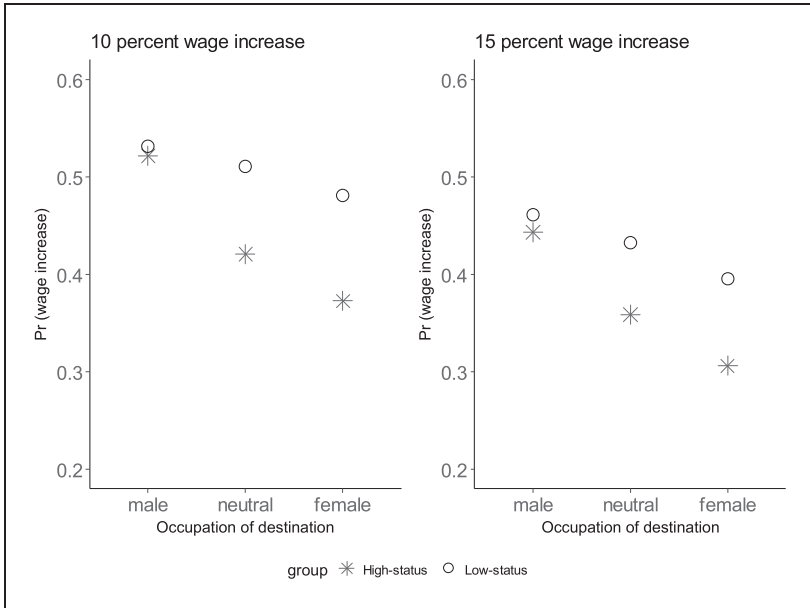

**Figure A1.** Probability of wage increase by occupation of destination.
